# Supplementary material for: ΔNp63α expression induces loss of cell adhesion in triple-negative breast cancer cells
Source: PubMed Central journal article supplement (PMC5057421; doi:10.1186/s12885-016-2808-x), 2016-10-10
Supplement: 12885_2016_2808_MOESM1_ESM.pdf [file 12885_2016_2808_MOESM1_ESM.pdf]

**Additional file 1:** List of primers used for qRT-PCR

| <b>PRIMER</b> | <b>SEQUENCE</b>                 |
|---------------|---------------------------------|
| RHOA-F        | 5'-TGAAAACATATGTGGCGGATATCG-3'  |
| RHOA-R        | 5'-TCTGCTTCTTCAGGTTAACCGG-3'    |
| ITGB4-F       | 5'-GCGACTACACTATTGGATTTGGC-3'   |
| ITGB4-R       | 5'-TGTCAGGCTGATGACGTTCTTG-3'    |
| ITGA2-F       | 5'-TGCTGGTTGAAAGACGTTACATG-3'   |
| ITGA2-R       | 5'-TATAACTCCTGTTGGTACTTCGGC-3'  |
| FAT2-F        | 5'-CATGAATTCAAGCTGGATCCTC-3'    |
| FAT2-R        | 5'-CTCGGTCTAGGGCAGTGAGT-3'      |
| PAK6-F        | 5'-TGAGGAGCAGATTGCCACTGTG-3'    |
| PAK6-R        | 5'-CTGAGCACAGAATCCGAAGTCC-3'    |
| DSC3-F        | 5'-CACTTACTCGGAGTGGCACAGT-3'    |
| DSC3-R        | 5'-AGCTGGAGATCCTCTCCCTCA-3'     |
| MTSS1-F       | 5'-TCAAGAACAGATGGAAGAATGG-3'    |
| MTSS1-R       | 5'-TGCGGTAGCGGTAATGTG-3'        |
| CLDN1-F       | 5'-AATTCTATGACCCTATGACCC-3'     |
| CLDN1-R       | 5'-GACAGGAACAGCAAAGTAGG-3'      |
| KLK5-F        | 5'-GCAGGTAGAGACTCCTGCCA-3'      |
| KLK5-R        | 5'-CACAAGGGTAATCTCCCCAG-3'      |
| CLDN10-F      | 5'-TTGATCCTCTCTTTGTTGAGCA-3'    |
| CLDN10-R      | 5'-AAGCAAAATATGACACCACCA-3'     |
| SVIL-F        | 5'-TTCACTAAGAGCGGCAGAG-3'       |
| SVIL-R        | 5'-TTCTCCTGTGGCTGTTCC-3'        |
| LAMA4-F       | 5'-GAGGAGGCAGATGAGGCTTAC-3'     |
| LAMA4-R       | 5'-ACGACAGGAAACAGAGTGCGG-3'     |
| CEACAM6-F     | 5'-GAAATACAGAACCCAGCGAGTGC-3'   |
| CEACAM6-R     | 5'-CAGTGATGTTGGGGATAAAGAGC-3'   |
| PAK1-F        | 5'-GCTGTTCTGGATGTGTTGGA-3'      |
| PAK1-R        | 5'-TTCTGAAACTGGTGGCACTG-3'      |
| VAV1-F        | 5'-TGCTTCAAGTCTCTGGACACCAC-3'   |
| VAV1-R        | 5'-TCTCGGGCGCAGAAGTCATA-3'      |
| PXN-F         | 5'-AACAAGCAGAAGTCAGCAGAGCC-3'   |
| PXN-R         | 5'-CTAGCTTGTTCAAGTCCGAC-3'      |
| RAB7B-F       | 5'-GGCCAGCATCCTCTCCAAGATTATC-3' |
| RAB7B-R       | 5'-GATGCAGCCATCGGAGCCCTTGT-3'   |
| TNS3-F        | 5'-GTTGAAAGGGTGCTCGAATGA-3'     |
| TNS3-R        | 5'-GAACTTTCTGCTATTTCTCCAATG-3'  |
| TNS4-F        | 5'-CCCACCATGAAGTTCGTGATG-3'     |
| TNS4-R        | 5'-CGGTATGAAGAGCTGTCCCTTATG-3'  |
| OLFM4-F       | 5'-AGCTCTTCCCAGGTGTTGA-3'       |

|                 |                               |
|-----------------|-------------------------------|
| OLFM4-R         | 5'-AAGCGTTCCACTCTGTCCAC-3'    |
| LPXN-F          | 5'-ACGCTCCACCCTTCAGGACA-3'    |
| LPXN-R          | 5'-GACATTGAGCTCCTGGATATTGG-3' |
| MUC1-F          | 5'-CCTTTCTCCTGCTGCTG-3'       |
| MUC1-R          | 5'-TGGGACTGAACTTCTCTG-3'      |
| $\Delta$ Np63-F | 5'AGCCAGAAGAAAGGACAGCA'3      |
| $\Delta$ Np63-R | 5'TCACTAAATTGAGTCTGGGCAT'3    |
| TAp63-F         | 5'GTCCCAGAGCACACAGACAA'3      |
| TAp63-R         | 5'TGCGGATACAGTCCATGCTA'3      |
