# Supplementary material for: ΔNp63α expression induces loss of cell adhesion in triple-negative breast cancer cells
Source: PubMed Central journal article supplement (PMC5057421; doi:10.1186/s12885-016-2808-x), 2016-10-10

## Additional file 2: Expression of *TP63* in breast cancer cell lines

*TP63* mRNA expression in cell lines according to CCLE

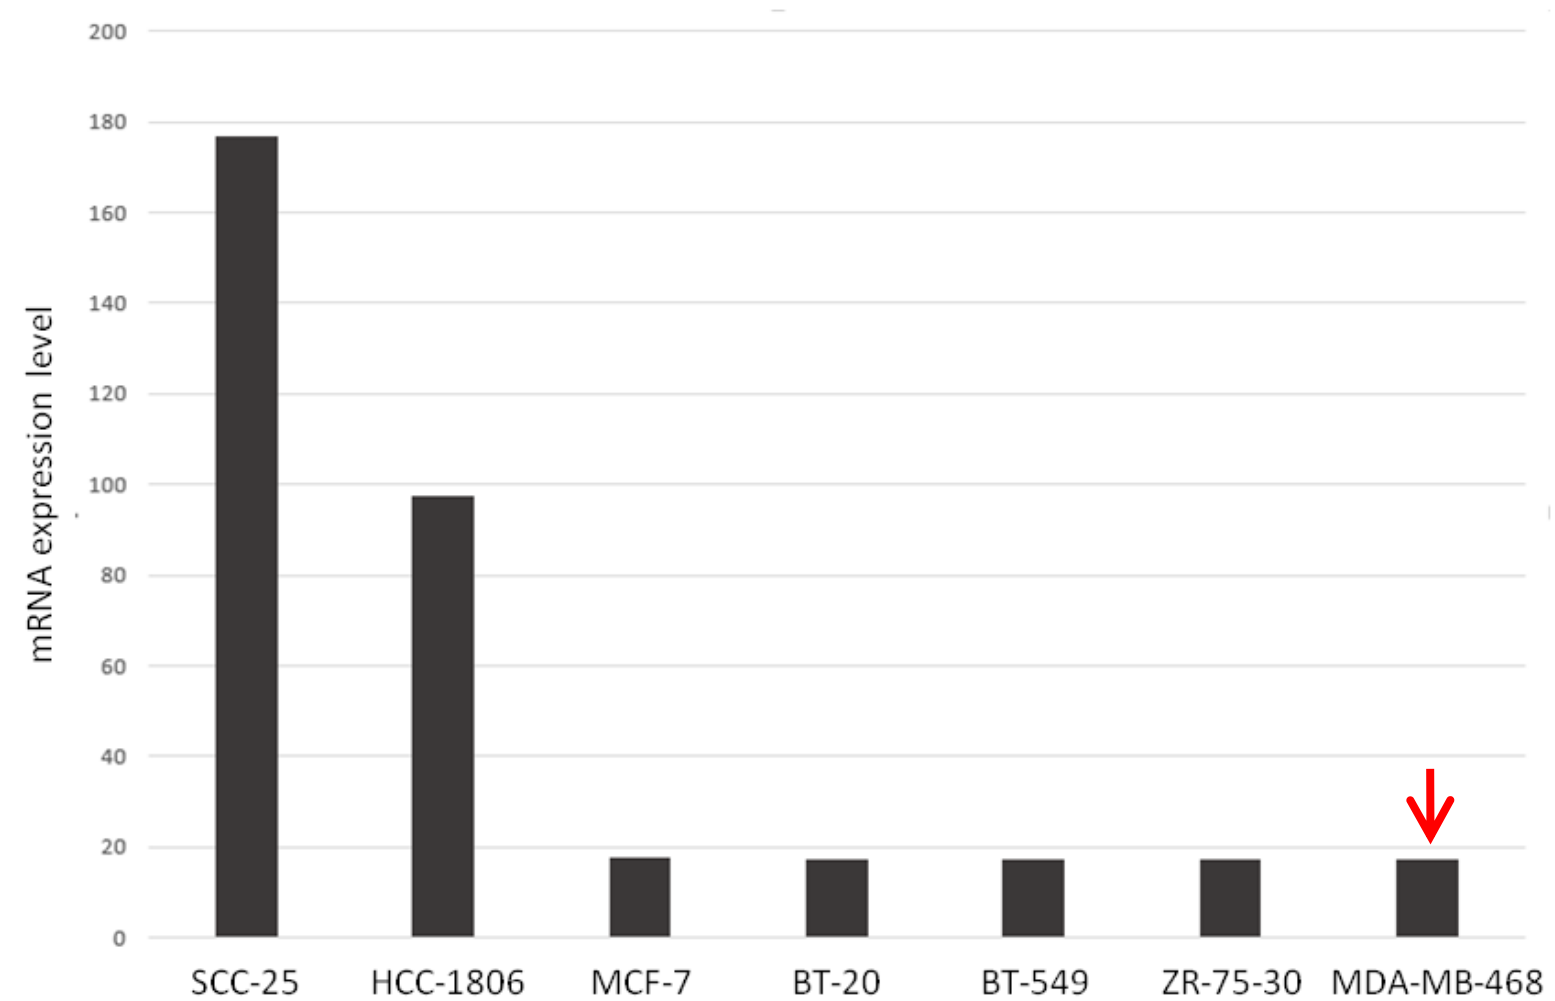

*TP63* mRNA expression in cell lines according to RNAseq (Klijn et al., 2016)

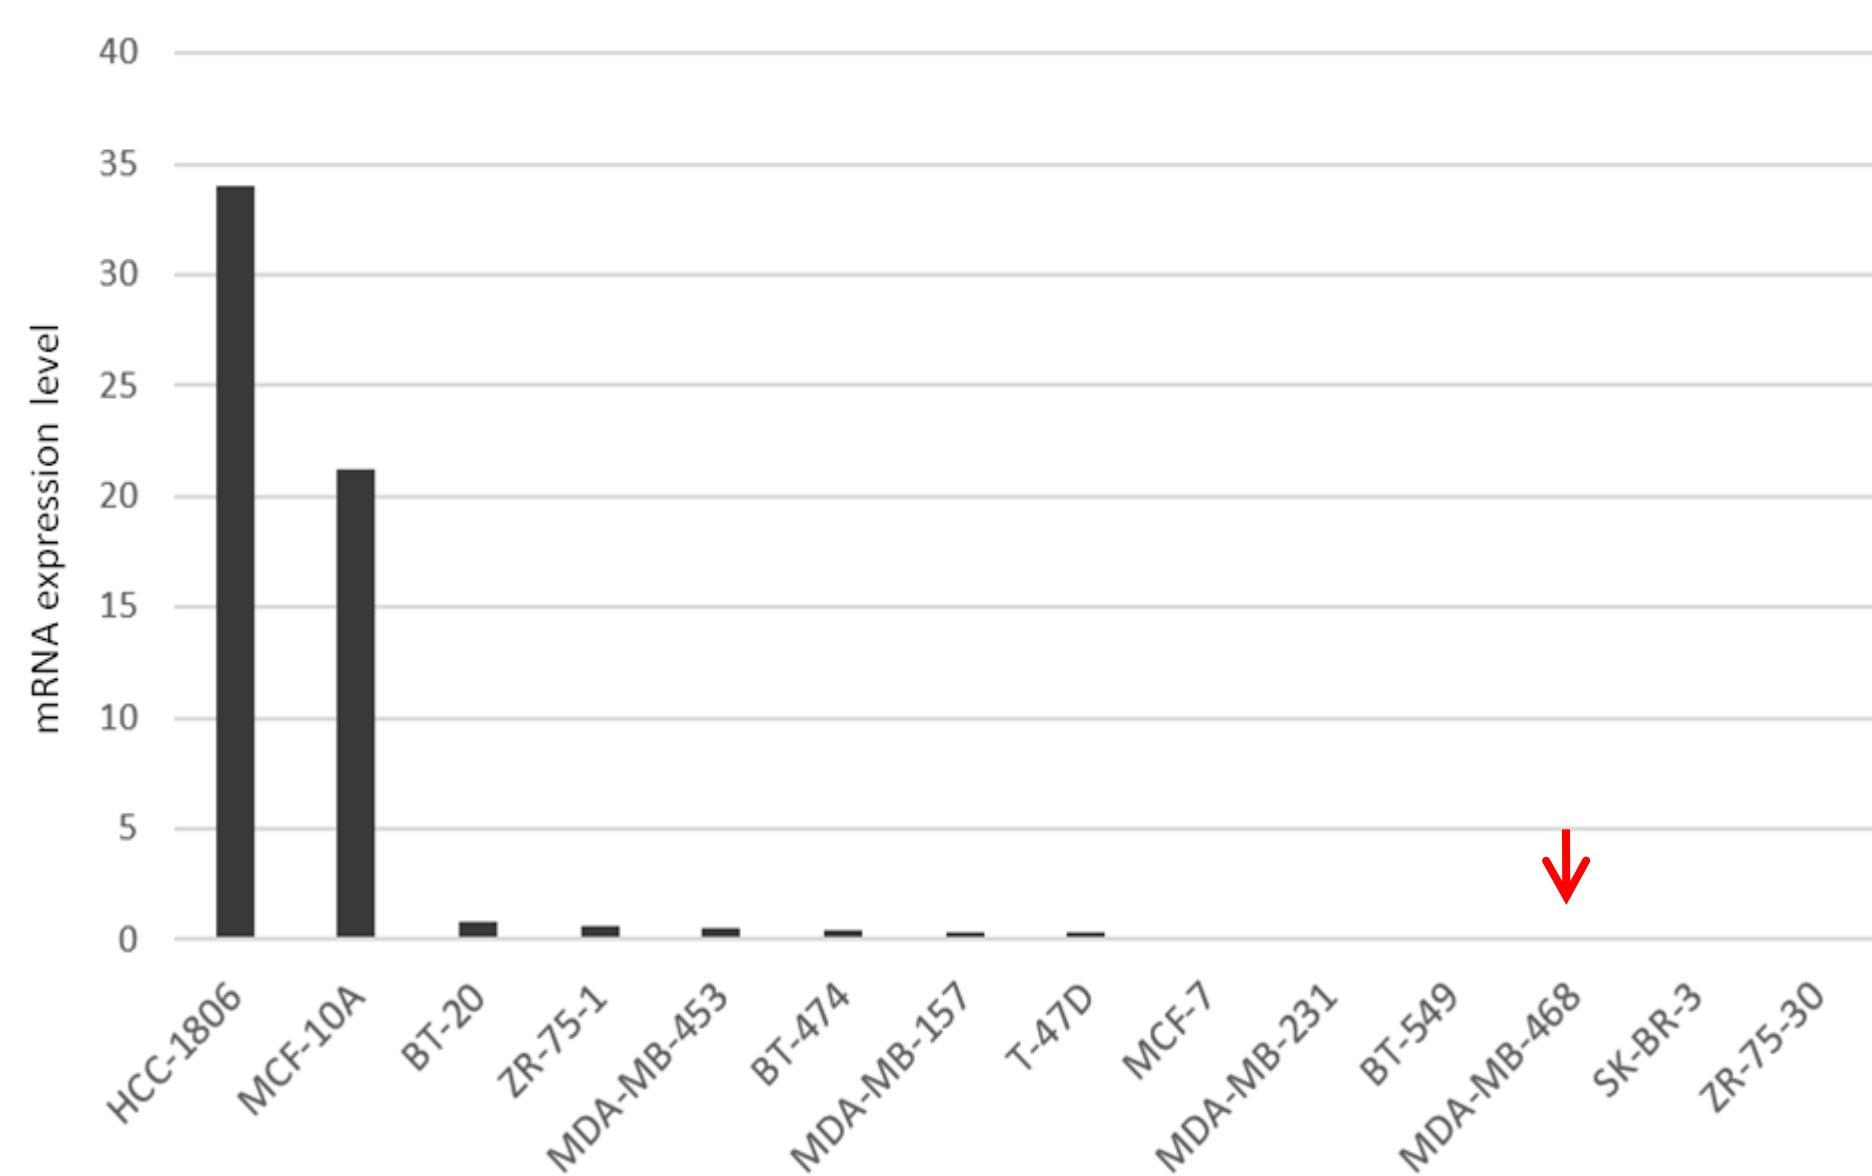

$\Delta Np63$  mRNA expression in breast cancer cell lines (qRT-PCR)

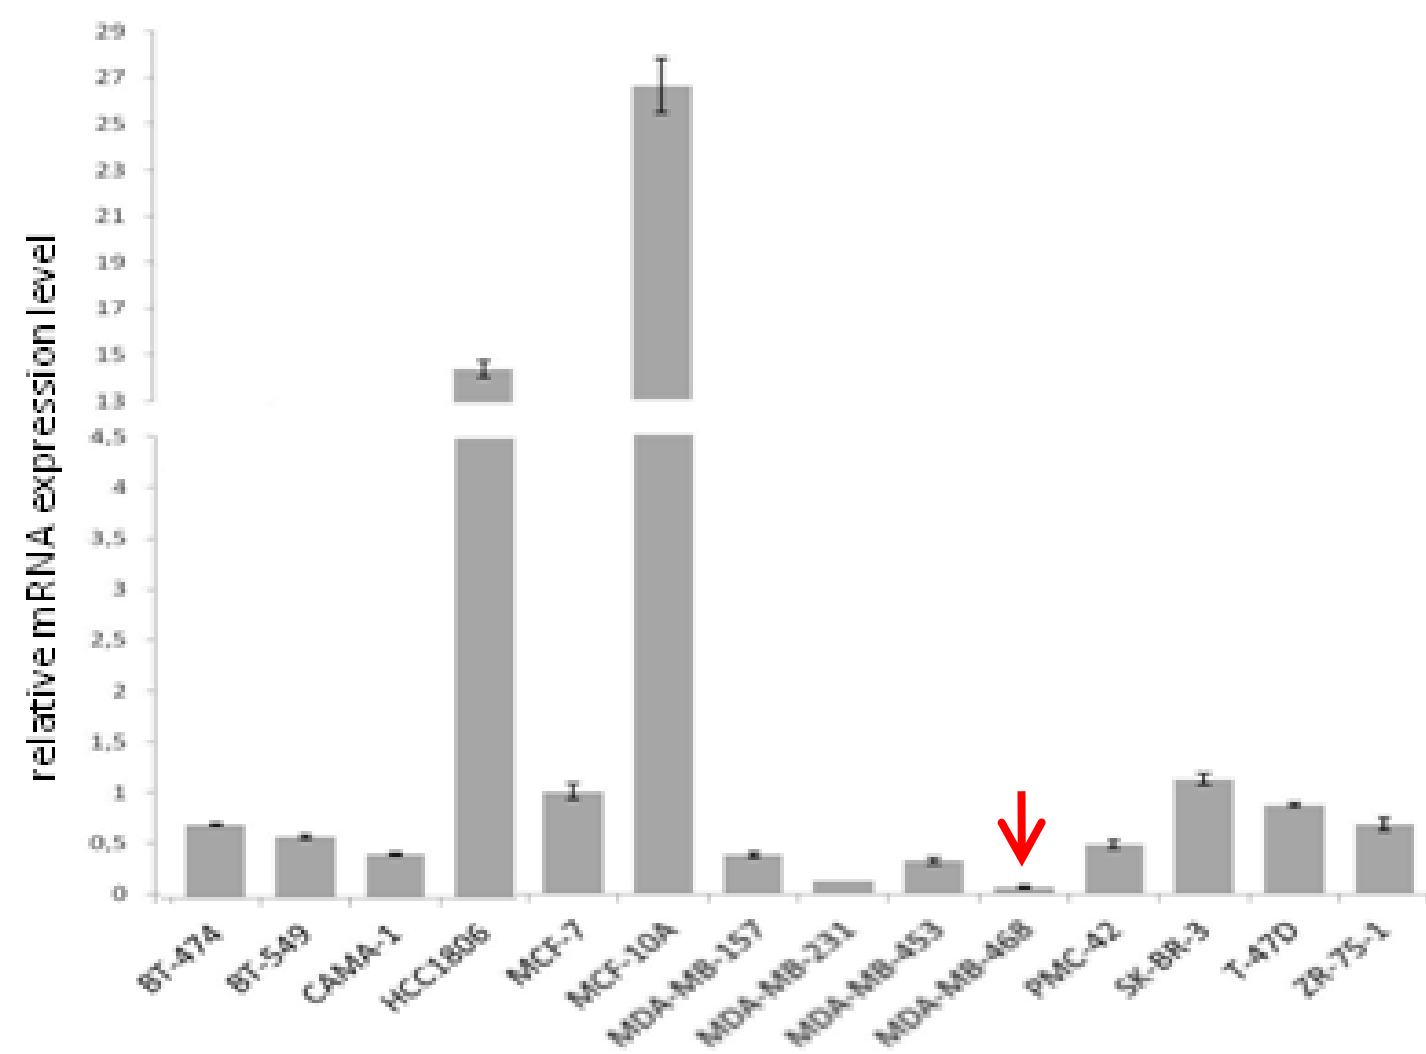

*TAp63* mRNA expression in breast cancer cell lines (qRT-PCR)

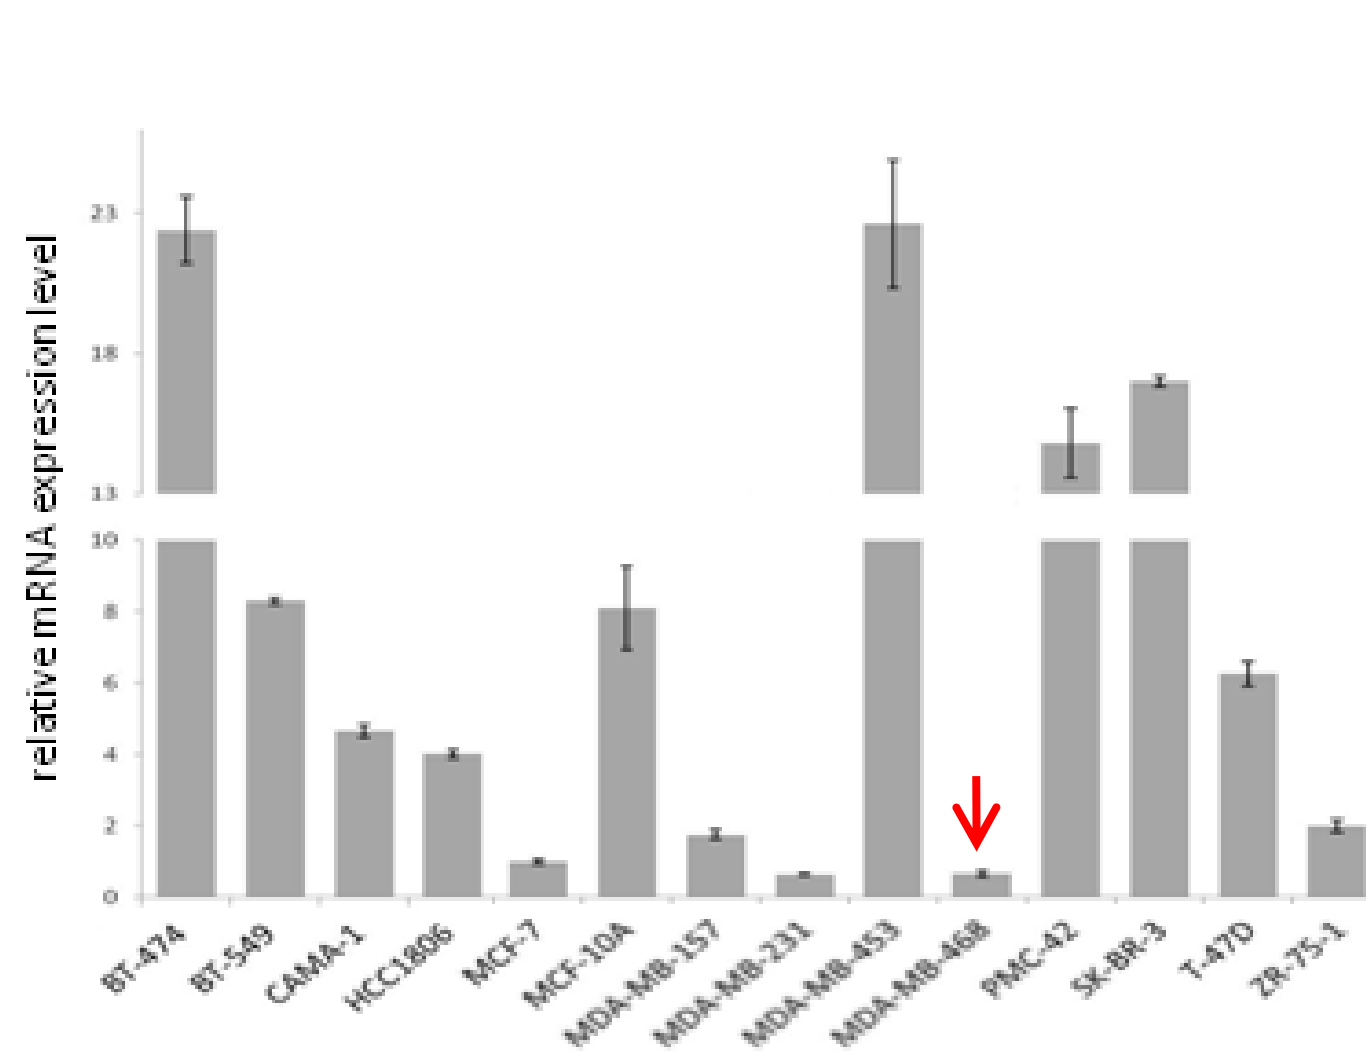

Supplement: 12885_2016_2808_MOESM2_ESM.pdf [file 12885_2016_2808_MOESM2_ESM.pdf]
