# Supplementary material for: ΔNp63α expression induces loss of cell adhesion in triple-negative breast cancer cells
Source: PubMed Central journal article supplement (PMC5057421; doi:10.1186/s12885-016-2808-x), 2016-10-10
Supplement: 12885_2016_2808_MOESM3_ESM.pdf [file 12885_2016_2808_MOESM3_ESM.pdf]

**Additional file 3:** List of genes whose expression was changed 24 h after induction of  $\Delta$ Np63 $\alpha$  or TAp63 $\alpha$  expression in MDA-MB-468 cells.

| Genes differentially expressed 24 h after induction of $\Delta$ Np63 $\alpha$ expression in MDA-MB-468- $\Delta$ Np63 $\alpha$ cells ( $p < 0.05$ ) |             |               |             |
|-----------------------------------------------------------------------------------------------------------------------------------------------------|-------------|---------------|-------------|
| PROBE_ID                                                                                                                                            | GENE SYMBOL | adj-p-values, | fold change |
| ILMN_3224962                                                                                                                                        | TP63        | 7.2E-07       | 13.5        |
| ILMN_1771688                                                                                                                                        | RAB7B       | 2.0E-05       | 7.5         |
| ILMN_1725852                                                                                                                                        | S100A2      | 4.6E-07       | 4.8         |
| ILMN_1723123                                                                                                                                        | FGFR3       | 1.1E-05       | 4.5         |
| ILMN_1690454                                                                                                                                        | C3orf54     | 9.9E-05       | 4.2         |
| ILMN_1752755                                                                                                                                        | VWF         | 1.8E-04       | 3.8         |
| ILMN_1696585                                                                                                                                        | FERMT1      | 2.2E-04       | 3.7         |
| ILMN_2094266                                                                                                                                        | HES2        | 8.6E-05       | 3.7         |
| ILMN_2133205                                                                                                                                        | GPX2        | 7.1E-05       | 3.6         |
| ILMN_2073184                                                                                                                                        | S1PR5       | 1.5E-03       | 3.6         |
| ILMN_1656422                                                                                                                                        | GPR87       | 1.1E-05       | 3.1         |
| ILMN_1666076                                                                                                                                        | ARHGEF4     | 7.7E-05       | 3.0         |
| ILMN_1758613                                                                                                                                        | RAPGEFL1    | 7.7E-05       | 3.0         |
| ILMN_1741755                                                                                                                                        | TRIM29      | 1.5E-04       | 3.0         |
| ILMN_1758888                                                                                                                                        | PADI3       | 2.1E-04       | 2.9         |
| ILMN_2134974                                                                                                                                        | RAB38       | 1.8E-04       | 2.9         |
| ILMN_2132599                                                                                                                                        | ANKRD22     | 2.8E-05       | 2.9         |
| ILMN_2128931                                                                                                                                        | FAT2        | 1.1E-05       | 2.8         |
| ILMN_2334210                                                                                                                                        | ITGB4       | 1.8E-04       | 2.7         |
| ILMN_1735365                                                                                                                                        | GJB5        | 3.1E-04       | 2.7         |
| ILMN_2228162                                                                                                                                        | KRT16       | 5.4E-03       | 2.6         |
| ILMN_3308295                                                                                                                                        | MIR205      | 1.3E-02       | 2.6         |
| ILMN_2219002                                                                                                                                        | KRT6A       | 1.1E-02       | 2.5         |
| ILMN_1666845                                                                                                                                        | KRT17       | 1.1E-05       | 2.5         |
| ILMN_1708223                                                                                                                                        | PAK6        | 9.8E-04       | 2.4         |
| ILMN_1764571                                                                                                                                        | ARHGAP23    | 7.8E-05       | 2.3         |
| ILMN_1777998                                                                                                                                        | ARHGAP25    | 8.6E-03       | 2.3         |
| ILMN_2072357                                                                                                                                        | IRF6        | 4.2E-04       | 2.3         |
| ILMN_1738558                                                                                                                                        | RGS20       | 6.7E-04       | 2.3         |
| ILMN_1738742                                                                                                                                        | PLAT        | 2.6E-03       | 2.2         |
| ILMN_1784602                                                                                                                                        | CDKN1A      | 6.5E-03       | 2.2         |
| ILMN_2339835                                                                                                                                        | PTGS1       | 3.6E-03       | 2.2         |
| ILMN_1765363                                                                                                                                        | DSC3        | 9.6E-04       | 2.2         |
| ILMN_2148469                                                                                                                                        | RASL11B     | 9.7E-03       | 2.2         |
| ILMN_1693218                                                                                                                                        | ART3        | 7.3E-04       | 2.2         |
| ILMN_1777170                                                                                                                                        | LOC440585   | 9.7E-03       | 2.1         |
| ILMN_1782863                                                                                                                                        | FAM83B      | 5.3E-03       | 2.1         |
| ILMN_1665792                                                                                                                                        | ITGA2       | 8.6E-05       | 2.1         |
| ILMN_1799098                                                                                                                                        | LOC652846   | 1.1E-03       | 2.1         |

|              |           |         |     |
|--------------|-----------|---------|-----|
| ILMN_2073289 | MTSS1     | 1.1E-02 | 2.1 |
| ILMN_1791545 | KRT23     | 1.8E-02 | 2.1 |
| ILMN_2186983 | ANXA8L2   | 1.9E-04 | 2.1 |
| ILMN_1653934 | LOC650517 | 4.5E-04 | 2.1 |
| ILMN_2095610 | ANXA8     | 8.8E-03 | 2.1 |
| ILMN_1700583 | ZNF750    | 6.7E-03 | 2.1 |
| ILMN_1665865 | IGFBP4    | 2.9E-03 | 2.1 |
| ILMN_1652185 | IL4R      | 9.2E-04 | 2.1 |
| ILMN_2134056 | SOX7      | 9.3E-05 | 2.1 |
| ILMN_1770612 | KRT15     | 6.4E-04 | 2.0 |
| ILMN_2221046 | GM2A      | 3.9E-02 | 2.0 |
| ILMN_1654217 | MPP2      | 7.0E-03 | 2.0 |
| ILMN_1693090 | CROT      | 4.9E-03 | 2.0 |
| ILMN_1739605 | LYPD3     | 2.9E-03 | 2.0 |
| ILMN_1794501 | HAS3      | 1.0E-02 | 2.0 |
| ILMN_1720158 | ETS2      | 1.9E-03 | 2.0 |
| ILMN_1808707 | FSCN1     | 1.3E-03 | 1.9 |
| ILMN_1724686 | CLDN1     | 1.2E-04 | 1.9 |
| ILMN_1723418 | CEL       | 7.0E-03 | 1.9 |
| ILMN_1661628 | LOC653110 | 1.1E-03 | 1.9 |
| ILMN_1806607 | SFN       | 2.2E-04 | 1.9 |
| ILMN_1715647 | VANGL2    | 2.7E-03 | 1.9 |
| ILMN_3195198 | KRT17P3   | 2.9E-04 | 1.9 |
| ILMN_2189027 | LIPG      | 4.5E-02 | 1.9 |
| ILMN_1684211 | SEC14L2   | 4.7E-03 | 1.9 |
| ILMN_2095759 | OGFRL1    | 2.0E-03 | 1.9 |
| ILMN_1792885 | CTSC      | 6.4E-03 | 1.9 |
| ILMN_1659766 | BAG3      | 1.8E-03 | 1.9 |
| ILMN_1718731 | KLK5      | 2.9E-02 | 1.9 |
| ILMN_2334531 | GJB3      | 4.9E-03 | 1.8 |
| ILMN_1661137 | SH3RF2    | 7.0E-03 | 1.8 |
| ILMN_1656938 | LOC731486 | 3.1E-03 | 1.8 |
| ILMN_1669888 | CSTA      | 1.8E-03 | 1.8 |
| ILMN_1659106 | PHLDA3    | 5.3E-03 | 1.8 |
| ILMN_1752932 | MPZL2     | 1.9E-03 | 1.8 |
| ILMN_1801632 | KRT5      | 5.7E-03 | 1.8 |
| ILMN_1719883 | CYP4F11   | 5.1E-03 | 1.8 |
| ILMN_1695959 | C21orf63  | 2.9E-03 | 1.8 |
| ILMN_1671123 | LOC647543 | 1.6E-03 | 1.7 |
| ILMN_1684653 | GPR115    | 2.8E-02 | 1.7 |
| ILMN_1703435 | ZNF658    | 2.5E-02 | 1.7 |
| ILMN_1729161 | NOTCH1    | 1.4E-03 | 1.7 |
| ILMN_1780132 | PELI2     | 1.3E-02 | 1.7 |
| ILMN_1761820 | EDARADD   | 1.9E-02 | 1.7 |
| ILMN_1676413 | VSNL1     | 5.4E-03 | 1.7 |
| ILMN_2104106 | XPR1      | 9.2E-04 | 1.7 |

|              |           |         |     |
|--------------|-----------|---------|-----|
| ILMN_2098418 | LOC652968 | 3.6E-03 | 1.7 |
| ILMN_1708041 | PLEKHF1   | 7.2E-03 | 1.7 |
| ILMN_1741544 | KRT38     | 4.9E-03 | 1.7 |
| ILMN_1737988 | PRNP      | 1.6E-03 | 1.7 |
| ILMN_1670325 | SLC47A1   | 4.2E-03 | 1.7 |
| ILMN_1803236 | CLCA2     | 8.3E-03 | 1.6 |
| ILMN_2124471 | SLC36A1   | 1.0E-02 | 1.6 |
| ILMN_1733045 | RAB36     | 4.1E-04 | 1.6 |
| ILMN_1751034 | ITPRIPL2  | 2.6E-02 | 1.6 |
| ILMN_1794825 | ALDH3A2   | 4.5E-04 | 1.6 |
| ILMN_1815130 | MICALL1   | 4.3E-04 | 1.6 |
| ILMN_1803256 | STOX2     | 5.0E-02 | 1.6 |
| ILMN_1778144 | FLJ20489  | 2.0E-02 | 1.6 |
| ILMN_1769849 | HORMAD1   | 4.8E-02 | 1.6 |
| ILMN_1654735 | SLCO3A1   | 2.7E-03 | 1.6 |
| ILMN_1699809 | CAPNS2    | 8.5E-03 | 1.6 |
| ILMN_2088124 | TMEM154   | 5.6E-03 | 1.6 |
| ILMN_1699489 | TUBB6     | 6.2E-04 | 1.6 |
| ILMN_1743103 | SH3PXD2A  | 2.0E-02 | 1.6 |
| ILMN_3242004 | ANXA8L1   | 2.5E-03 | 1.6 |
| ILMN_2332250 | ACOT7     | 4.9E-03 | 1.6 |
| ILMN_1702787 | SEMA4A    | 2.7E-02 | 1.5 |
| ILMN_1686679 | ZNF462    | 3.8E-03 | 1.5 |
| ILMN_2382290 | KREMEN2   | 2.4E-02 | 1.5 |
| ILMN_1758146 | SIRPA     | 3.2E-03 | 1.5 |
| ILMN_1723412 | ASCL2     | 3.4E-02 | 1.5 |
| ILMN_3243924 | P2RX6     | 3.0E-03 | 1.5 |
| ILMN_2052208 | GADD45A   | 3.4E-02 | 1.5 |
| ILMN_1748881 | MRAS      | 4.5E-02 | 1.5 |
| ILMN_2219246 | LOC162073 | 4.8E-02 | 1.5 |
| ILMN_1664861 | ID1       | 4.5E-03 | 1.5 |
| ILMN_3235221 | LOC644936 | 5.7E-03 | 1.5 |
| ILMN_1698732 | PALLD     | 4.8E-02 | 1.5 |
| ILMN_1752451 | CTSH      | 1.8E-02 | 1.5 |
| ILMN_1737208 | NTF5      | 8.3E-03 | 1.5 |
| ILMN_2329679 | TPST2     | 7.1E-03 | 1.5 |
| ILMN_1803647 | FAM162A   | 4.8E-02 | 1.5 |
| ILMN_1786326 | KCTD15    | 2.3E-02 | 1.5 |
| ILMN_2138589 | MERTK     | 7.0E-03 | 1.5 |
| ILMN_1675612 | BLCAP     | 1.9E-02 | 1.5 |
| ILMN_1766054 | ABCA1     | 1.0E-02 | 1.5 |
| ILMN_1769546 | RIN2      | 5.7E-03 | 1.5 |
| ILMN_1676665 | CUEDC1    | 5.9E-03 | 1.5 |
| ILMN_1721818 | CLDN10    | 1.2E-02 | 1.5 |
| ILMN_1689585 | C20orf194 | 1.9E-02 | 1.5 |
| ILMN_1765607 | SLC6A2    | 4.9E-02 | 1.5 |

|              |           |         |     |
|--------------|-----------|---------|-----|
| ILMN_1664267 | WBSCR28   | 1.9E-02 | 1.5 |
| ILMN_1671404 | SVIL      | 1.0E-03 | 1.5 |
| ILMN_1744381 | SERPINE1  | 2.9E-02 | 1.4 |
| ILMN_3298400 | LOC731954 | 2.1E-02 | 1.4 |
| ILMN_2396546 | IGSF3     | 7.6E-04 | 1.4 |
| ILMN_2063114 | TAF1D     | 3.8E-02 | 1.4 |
| ILMN_1756784 | FREQ      | 1.2E-02 | 1.4 |
| ILMN_1673769 | KCNG1     | 1.4E-02 | 1.4 |
| ILMN_2153485 | NMNAT3    | 1.2E-02 | 1.4 |
| ILMN_1761463 | EFHD2     | 2.3E-03 | 1.4 |
| ILMN_1664698 | UNC119    | 2.0E-02 | 1.4 |
| ILMN_3247723 | NOP16     | 9.5E-03 | 1.4 |
| ILMN_2096719 | GRK5      | 1.3E-02 | 1.4 |
| ILMN_1788942 | GGT6      | 1.8E-02 | 1.4 |
| ILMN_1712046 | CPXM1     | 2.9E-02 | 1.4 |
| ILMN_1809894 | TMEM117   | 2.7E-02 | 1.4 |
| ILMN_1793859 | ALDH2     | 4.8E-02 | 1.4 |
| ILMN_3227263 | SLC22A23  | 9.2E-03 | 1.4 |
| ILMN_1785404 | FGFBP1    | 9.2E-03 | 1.4 |
| ILMN_1804539 | GPR89B    | 1.7E-02 | 1.4 |
| ILMN_1651819 | GALNT11   | 6.6E-03 | 1.4 |
| ILMN_2048636 | ME2       | 1.4E-02 | 1.4 |
| ILMN_1669557 | AIM1L     | 4.7E-02 | 1.4 |
| ILMN_2181241 | LOC649946 | 4.8E-02 | 1.4 |
| ILMN_1721559 | FABP6     | 2.1E-02 | 1.4 |
| ILMN_1667239 | INPP1     | 4.5E-02 | 1.4 |
| ILMN_2224657 | KLRG2     | 1.5E-02 | 1.4 |
| ILMN_1795865 | FGFRL1    | 2.4E-02 | 1.4 |
| ILMN_1809099 | IL33      | 2.7E-02 | 1.3 |
| ILMN_1716370 | TNS4      | 3.5E-02 | 1.3 |
| ILMN_1660976 | LOC653204 | 3.1E-02 | 1.3 |
| ILMN_1772123 | ACACA     | 9.9E-03 | 1.3 |
| ILMN_1705116 | C6orf85   | 2.2E-02 | 1.3 |
| ILMN_1654385 | ASB13     | 1.9E-02 | 1.3 |
| ILMN_1783304 | ATP1B3    | 3.2E-02 | 1.3 |
| ILMN_3199755 | LOC646821 | 2.9E-02 | 1.3 |
| ILMN_1792660 | CAMSAP1L1 | 1.2E-02 | 1.3 |
| ILMN_2311537 | HMGA1     | 2.6E-03 | 1.3 |
| ILMN_1687275 | JUB       | 4.1E-03 | 1.3 |
| ILMN_2357781 | ZNF436    | 7.7E-03 | 1.3 |
| ILMN_2147517 | CD58      | 3.6E-02 | 1.3 |
| ILMN_1659027 | SLC2A1    | 5.4E-03 | 1.3 |
| ILMN_1729749 | HERC5     | 2.5E-02 | 1.3 |
| ILMN_2362902 | RASSF5    | 9.9E-03 | 1.3 |
| ILMN_2361400 | ABCA12    | 2.1E-02 | 1.3 |
| ILMN_1710209 | MFSD6     | 4.8E-02 | 1.3 |

|              |              |         |     |
|--------------|--------------|---------|-----|
| ILMN_1745954 | CORO1C       | 2.0E-02 | 1.3 |
| ILMN_2359211 | AP2A1        | 3.1E-02 | 1.3 |
| ILMN_1764090 | AK3L1        | 2.9E-02 | 1.3 |
| ILMN_1690826 | TNKS1BP1     | 1.8E-02 | 1.3 |
| ILMN_3287266 | LOC100133328 | 3.5E-02 | 1.3 |
| ILMN_1696316 | CPT1A        | 2.7E-02 | 1.3 |
| ILMN_3236765 | UPLP         | 4.8E-02 | 1.3 |
| ILMN_1777499 | LOC731007    | 2.1E-02 | 1.3 |
| ILMN_1792182 | RDH12        | 1.5E-02 | 1.3 |
| ILMN_1775677 | TYSND1       | 1.3E-02 | 1.3 |
| ILMN_1739001 | TACSTD2      | 1.2E-02 | 1.3 |
| ILMN_2353202 | PTK7         | 2.4E-02 | 1.3 |
| ILMN_1740170 | CHCHD10      | 3.2E-02 | 1.3 |
| ILMN_1780298 | FAM86A       | 4.4E-02 | 1.3 |
| ILMN_1688295 | ZNF219       | 3.1E-02 | 1.3 |
| ILMN_1714667 | C20orf107    | 1.1E-02 | 1.3 |
| ILMN_2184640 | NOLC1        | 4.5E-02 | 1.2 |
| ILMN_2142353 | GRTP1        | 3.1E-02 | 1.2 |
| ILMN_2386008 | MPZL1        | 3.5E-02 | 1.2 |
| ILMN_2184184 | ANXA1        | 4.9E-02 | 1.2 |
| ILMN_1666306 | SRRD         | 4.6E-02 | 1.2 |
| ILMN_1800465 | LOC654042    | 4.1E-02 | 0.8 |
| ILMN_1735093 | TIMELESS     | 2.6E-02 | 0.8 |
| ILMN_1667101 | PRM3         | 2.6E-02 | 0.8 |
| ILMN_1703886 | SLC16A2      | 2.9E-02 | 0.8 |
| ILMN_3176989 | HAUS8        | 4.9E-02 | 0.8 |
| ILMN_2399769 | GPR177       | 4.8E-02 | 0.8 |
| ILMN_1752728 | FUCA1        | 2.0E-02 | 0.8 |
| ILMN_3288755 | LOC646808    | 4.6E-02 | 0.8 |
| ILMN_1734190 | TCEAL3       | 5.4E-03 | 0.8 |
| ILMN_1672148 | AKR1B10      | 2.0E-02 | 0.8 |
| ILMN_1784110 | PCTK3        | 4.7E-02 | 0.8 |
| ILMN_2374778 | DUT          | 9.2E-03 | 0.8 |
| ILMN_1682336 | MASTL        | 2.9E-02 | 0.8 |
| ILMN_2230892 | IL10RB       | 1.8E-02 | 0.8 |
| ILMN_1700633 | ABHD4        | 1.2E-02 | 0.8 |
| ILMN_3248091 | C6orf223     | 4.6E-02 | 0.8 |
| ILMN_1751097 | CREB3L2      | 1.5E-02 | 0.8 |
| ILMN_1668453 | TRIM36       | 2.7E-02 | 0.8 |
| ILMN_1763091 | C14orf43     | 1.2E-02 | 0.8 |
| ILMN_1694780 | GCHFR        | 3.2E-02 | 0.8 |
| ILMN_1666924 | PINK1        | 9.1E-03 | 0.8 |
| ILMN_1662852 | IQCK         | 2.6E-02 | 0.8 |
| ILMN_2340347 | PC           | 3.8E-02 | 0.8 |
| ILMN_1779855 | HSD17B6      | 4.8E-02 | 0.8 |
| ILMN_1666109 | MB           | 4.7E-02 | 0.8 |

|              |           |         |     |
|--------------|-----------|---------|-----|
| ILMN_1654331 | HOXB4     | 3.8E-02 | 0.8 |
| ILMN_1774110 | CHN2      | 4.9E-02 | 0.8 |
| ILMN_1715789 | DOCK1     | 3.0E-02 | 0.8 |
| ILMN_1684336 | VEPH1     | 3.5E-02 | 0.8 |
| ILMN_1758392 | ANKS1B    | 3.3E-02 | 0.8 |
| ILMN_1781691 | TRAK2     | 2.9E-02 | 0.8 |
| ILMN_2139761 | LIMCH1    | 1.4E-02 | 0.8 |
| ILMN_1779015 | ZNF467    | 3.8E-02 | 0.8 |
| ILMN_1680037 | FAM65A    | 4.8E-02 | 0.8 |
| ILMN_2057573 | FAM62B    | 3.2E-02 | 0.8 |
| ILMN_2364110 | GBA       | 2.6E-02 | 0.8 |
| ILMN_1677292 | C5orf30   | 3.6E-02 | 0.8 |
| ILMN_1755111 | C6orf199  | 4.4E-02 | 0.8 |
| ILMN_1775268 | HECW2     | 1.8E-02 | 0.8 |
| ILMN_2052373 | RAB17     | 2.3E-02 | 0.8 |
| ILMN_1678454 | CASP4     | 4.6E-02 | 0.8 |
| ILMN_1746359 | RERG      | 1.3E-02 | 0.8 |
| ILMN_1811006 | E2F8      | 3.3E-02 | 0.8 |
| ILMN_2338323 | CDC25B    | 3.1E-02 | 0.8 |
| ILMN_1663092 | CITED2    | 3.0E-02 | 0.8 |
| ILMN_1653711 | FZD2      | 4.9E-02 | 0.7 |
| ILMN_1794863 | CAMK2N1   | 3.5E-02 | 0.7 |
| ILMN_1742789 | LPXN      | 2.9E-02 | 0.7 |
| ILMN_2060115 | SORL1     | 9.3E-03 | 0.7 |
| ILMN_1670028 | LPIN2     | 3.1E-02 | 0.7 |
| ILMN_1688811 | SPRY4     | 4.9E-02 | 0.7 |
| ILMN_1690703 | C21orf34  | 4.8E-02 | 0.7 |
| ILMN_1685580 | CBLB      | 4.9E-02 | 0.7 |
| ILMN_1658709 | LAMB1     | 4.4E-02 | 0.7 |
| ILMN_1752927 | KIAA1600  | 1.9E-02 | 0.7 |
| ILMN_3231638 | FAM160B1  | 7.5E-03 | 0.7 |
| ILMN_1725726 | DHRS2     | 3.5E-02 | 0.7 |
| ILMN_1795247 | ARID2     | 5.3E-03 | 0.7 |
| ILMN_1704286 | FXYS5     | 7.7E-03 | 0.7 |
| ILMN_1763322 | CCR3      | 4.4E-02 | 0.7 |
| ILMN_1677814 | ABCC3     | 1.0E-02 | 0.7 |
| ILMN_1809077 | RFPL4B    | 2.2E-02 | 0.7 |
| ILMN_1769925 | C2CD4A    | 4.9E-02 | 0.7 |
| ILMN_1751234 | C1GALT1C1 | 1.0E-02 | 0.7 |
| ILMN_1736757 | GNPTAB    | 4.1E-02 | 0.7 |
| ILMN_1795704 | KIAA0232  | 1.3E-02 | 0.7 |
| ILMN_1665964 | GAB2      | 5.0E-02 | 0.7 |
| ILMN_1753010 | PET112L   | 1.9E-03 | 0.7 |
| ILMN_2178226 | KRT86     | 1.2E-02 | 0.7 |
| ILMN_1720996 | SLC12A2   | 4.3E-02 | 0.7 |
| ILMN_1752510 | FAM13A    | 3.8E-02 | 0.7 |

|              |           |         |     |
|--------------|-----------|---------|-----|
| ILMN_1723522 | APOLD1    | 4.7E-02 | 0.7 |
| ILMN_1673409 | MGC16121  | 1.0E-02 | 0.7 |
| ILMN_1651496 | HIST1H2BD | 5.6E-03 | 0.7 |
| ILMN_1716265 | PGM2L1    | 1.9E-02 | 0.7 |
| ILMN_1800091 | RARRES1   | 1.1E-02 | 0.7 |
| ILMN_1791123 | TMPRSS2   | 4.8E-02 | 0.7 |
| ILMN_1733937 | MMD       | 1.2E-02 | 0.7 |
| ILMN_1746952 | LOC153328 | 4.7E-02 | 0.7 |
| ILMN_1723962 | LXN       | 2.7E-02 | 0.7 |
| ILMN_1708375 | IRF1      | 2.3E-02 | 0.7 |
| ILMN_1777644 | PIB5PA    | 6.4E-04 | 0.7 |
| ILMN_1779448 | EFHD1     | 3.4E-03 | 0.7 |
| ILMN_1737514 | KYNU      | 9.2E-03 | 0.7 |
| ILMN_1687538 | ETS1      | 8.0E-03 | 0.7 |
| ILMN_1776936 | ANKRD38   | 1.2E-02 | 0.7 |
| ILMN_1690695 | PEX11A    | 4.5E-02 | 0.7 |
| ILMN_1678692 | MPRIP     | 4.9E-03 | 0.7 |
| ILMN_1698725 | FRMD3     | 2.9E-02 | 0.7 |
| ILMN_1709882 | ICK       | 1.8E-02 | 0.7 |
| ILMN_1671971 | LOC644743 | 2.9E-03 | 0.7 |
| ILMN_1753135 | ALK       | 3.5E-02 | 0.7 |
| ILMN_2371911 | MUC1      | 2.1E-02 | 0.7 |
| ILMN_1705080 | SLURP1    | 1.8E-02 | 0.7 |
| ILMN_1803423 | ARHGEF6   | 9.1E-03 | 0.7 |
| ILMN_1695290 | FERMT2    | 1.1E-02 | 0.7 |
| ILMN_1709683 | RASSF2    | 1.7E-02 | 0.7 |
| ILMN_1665331 | AMT       | 1.2E-02 | 0.7 |
| ILMN_2353633 | EMR2      | 4.3E-02 | 0.7 |
| ILMN_1705984 | HNMT      | 6.9E-03 | 0.7 |
| ILMN_1779252 | TRIM22    | 4.8E-02 | 0.7 |
| ILMN_1742332 | KCTD12    | 2.5E-02 | 0.7 |
| ILMN_2301722 | PDE8B     | 7.0E-03 | 0.7 |
| ILMN_2068104 | TFPI2     | 2.5E-02 | 0.7 |
| ILMN_1753584 | KRT8      | 8.7E-03 | 0.7 |
| ILMN_2257607 | STARD13   | 1.2E-02 | 0.7 |
| ILMN_1774901 | GDPD3     | 2.9E-02 | 0.7 |
| ILMN_1758272 | MYPN      | 3.3E-03 | 0.7 |
| ILMN_1724598 | RABL2A    | 2.1E-02 | 0.7 |
| ILMN_1712431 | FAM113B   | 7.1E-03 | 0.7 |
| ILMN_1659836 | RAET1G    | 4.8E-02 | 0.7 |
| ILMN_1691156 | MT1A      | 2.7E-02 | 0.7 |
| ILMN_1700042 | TLN2      | 9.3E-03 | 0.7 |
| ILMN_1687867 | LOC647954 | 2.6E-02 | 0.7 |
| ILMN_1698038 | FAM188B   | 5.6E-03 | 0.7 |
| ILMN_1768004 | PDCD4     | 3.9E-02 | 0.7 |
| ILMN_1694458 | FLJ41200  | 3.1E-02 | 0.7 |

|              |           |         |     |
|--------------|-----------|---------|-----|
| ILMN_1759550 | LOC644086 | 2.2E-02 | 0.7 |
| ILMN_2113490 | NTN4      | 2.1E-02 | 0.7 |
| ILMN_1815610 | SYT12     | 3.1E-03 | 0.7 |
| ILMN_1711904 | MXD3      | 1.3E-02 | 0.7 |
| ILMN_1681737 | TMSB15A   | 4.5E-02 | 0.7 |
| ILMN_1736911 | TMOD1     | 3.6E-03 | 0.7 |
| ILMN_1660552 | BMP5      | 1.1E-02 | 0.7 |
| ILMN_1796094 | CD36      | 6.1E-03 | 0.7 |
| ILMN_2228463 | DDC       | 1.6E-03 | 0.7 |
| ILMN_2159290 | LOC441376 | 2.7E-02 | 0.7 |
| ILMN_1658639 | SLC46A3   | 1.7E-04 | 0.7 |
| ILMN_1655904 | ROR1      | 5.3E-03 | 0.6 |
| ILMN_1750373 | KAL1      | 2.5E-02 | 0.6 |
| ILMN_1811272 | GPR81     | 9.8E-03 | 0.6 |
| ILMN_1662619 | TFPI      | 1.1E-03 | 0.6 |
| ILMN_1659856 | FAM167B   | 3.6E-02 | 0.6 |
| ILMN_1752478 | DHRS3     | 6.5E-03 | 0.6 |
| ILMN_1810420 | DYSF      | 2.4E-02 | 0.6 |
| ILMN_1688580 | CAMP      | 8.8E-03 | 0.6 |
| ILMN_1810191 | PLA2G4C   | 2.6E-03 | 0.6 |
| ILMN_1684497 | C10orf33  | 2.6E-02 | 0.6 |
| ILMN_1802654 | GLT8D2    | 3.6E-02 | 0.6 |
| ILMN_1744118 | ASTN2     | 2.3E-02 | 0.6 |
| ILMN_1801216 | S100P     | 5.3E-03 | 0.6 |
| ILMN_2190541 | XAGE2B    | 7.9E-03 | 0.6 |
| ILMN_1724181 | IL15      | 7.0E-03 | 0.6 |
| ILMN_1774604 | PNKD      | 4.4E-02 | 0.6 |
| ILMN_1747227 | ADORA1    | 9.7E-03 | 0.6 |
| ILMN_1746801 | CGN       | 2.9E-03 | 0.6 |
| ILMN_1734542 | OVGP1     | 2.1E-02 | 0.6 |
| ILMN_1703374 | NAV1      | 5.3E-03 | 0.6 |
| ILMN_1753507 | FRMPD3    | 2.6E-02 | 0.6 |
| ILMN_1781966 | OSBP2     | 1.2E-04 | 0.6 |
| ILMN_1730117 | TMC5      | 1.9E-03 | 0.6 |
| ILMN_1686664 | MT2A      | 8.5E-03 | 0.6 |
| ILMN_1693192 | PI3       | 1.2E-02 | 0.6 |
| ILMN_1785071 | SEPP1     | 1.8E-03 | 0.6 |
| ILMN_1755354 | YBX2      | 1.1E-03 | 0.6 |
| ILMN_1736184 | GSTM3     | 4.9E-03 | 0.6 |
| ILMN_1786041 | ASB9      | 1.4E-02 | 0.6 |
| ILMN_1775285 | ATP13A5   | 6.9E-03 | 0.6 |
| ILMN_1684377 | LOC649030 | 4.5E-03 | 0.6 |
| ILMN_1723443 | LRP2      | 3.7E-03 | 0.6 |
| ILMN_1658071 | ATP1B1    | 1.9E-02 | 0.6 |
| ILMN_1682181 | PHKG1     | 1.1E-02 | 0.6 |
| ILMN_1735816 | CYP4A11   | 1.2E-02 | 0.6 |



|              |           |         |     |
|--------------|-----------|---------|-----|
| ILMN_1777853 | MBOAT2    | 1.8E-02 | 0.6 |
| ILMN_1748751 | NLF2      | 1.1E-02 | 0.6 |
| ILMN_1678170 | MME       | 4.8E-02 | 0.6 |
| ILMN_1774077 | GBP2      | 2.3E-03 | 0.6 |
| ILMN_2054121 | C6orf126  | 2.9E-02 | 0.6 |
| ILMN_1674817 | C1orf115  | 1.5E-04 | 0.6 |
| ILMN_2071809 | MGP       | 3.6E-03 | 0.6 |
| ILMN_1712305 | CYBRD1    | 3.2E-02 | 0.6 |
| ILMN_1778956 | STS       | 2.0E-02 | 0.6 |
| ILMN_1680652 | SELENBP1  | 1.1E-03 | 0.6 |
| ILMN_1695590 | ADRB2     | 2.0E-04 | 0.6 |
| ILMN_1718852 | PLCL1     | 1.0E-02 | 0.6 |
| ILMN_2371280 | CSF3R     | 4.8E-02 | 0.6 |
| ILMN_1669338 | CYP4X1    | 5.1E-03 | 0.6 |
| ILMN_1699574 | NRP1      | 2.0E-03 | 0.6 |
| ILMN_1723139 | GPD2      | 2.1E-02 | 0.6 |
| ILMN_1691410 | BAMBI     | 5.7E-03 | 0.6 |
| ILMN_1746676 | CLDN8     | 5.6E-03 | 0.6 |
| ILMN_1766499 | HSPA2     | 1.5E-03 | 0.6 |
| ILMN_1771385 | GBP4      | 2.8E-02 | 0.6 |
| ILMN_1709067 | SAMD11    | 5.1E-03 | 0.6 |
| ILMN_1761903 | KCNS1     | 1.3E-03 | 0.6 |
| ILMN_2376403 | TSC22D3   | 2.9E-03 | 0.5 |
| ILMN_1697491 | FLJ14213  | 3.5E-02 | 0.5 |
| ILMN_1664176 | FBLN5     | 2.9E-02 | 0.5 |
| ILMN_1741768 | TMPRSS3   | 2.7E-05 | 0.5 |
| ILMN_1685608 | NPTX2     | 2.9E-03 | 0.5 |
| ILMN_2136446 | CTNNA1    | 4.2E-04 | 0.5 |
| ILMN_1784447 | PLCE1     | 3.4E-02 | 0.5 |
| ILMN_1807652 | STRA6     | 1.8E-03 | 0.5 |
| ILMN_1723333 | SCGB2A2   | 5.9E-03 | 0.5 |
| ILMN_1729417 | GENE      | 1.3E-02 | 0.5 |
| ILMN_2380237 | C1QTNF1   | 4.9E-03 | 0.5 |
| ILMN_1697220 | NT5E      | 3.4E-02 | 0.5 |
| ILMN_2410612 | DMBT1     | 1.2E-02 | 0.5 |
| ILMN_1803528 | LRR31     | 2.1E-03 | 0.5 |
| ILMN_1749792 | SORBS1    | 3.1E-02 | 0.5 |
| ILMN_1712522 | CEACAM6   | 1.8E-03 | 0.5 |
| ILMN_2343097 | NCALD     | 1.6E-03 | 0.5 |
| ILMN_2394287 | ATP6V0A4  | 2.1E-04 | 0.5 |
| ILMN_1714335 | RDH10     | 5.7E-03 | 0.5 |
| ILMN_1695354 | BMF       | 1.6E-03 | 0.5 |
| ILMN_3290136 | LOC643733 | 1.4E-02 | 0.5 |
| ILMN_2116299 | GRRP1     | 2.2E-03 | 0.5 |
| ILMN_1675808 | TCHHL1    | 9.2E-04 | 0.5 |
| ILMN_1714536 | SCGB1D2   | 1.1E-03 | 0.5 |

|              |           |         |     |
|--------------|-----------|---------|-----|
| ILMN_1740900 | BMP4      | 2.3E-02 | 0.5 |
| ILMN_1669376 | DRAM1     | 1.2E-04 | 0.5 |
| ILMN_1812073 | ATP6V1B1  | 4.0E-04 | 0.5 |
| ILMN_1678690 | UPB1      | 7.1E-04 | 0.5 |
| ILMN_2340259 | PDE4B     | 8.3E-04 | 0.4 |
| ILMN_2088437 | CX3CR1    | 7.2E-03 | 0.4 |
| ILMN_3194638 | FAM176A   | 5.9E-04 | 0.4 |
| ILMN_1795442 | LAMA4     | 7.7E-05 | 0.4 |
| ILMN_1702829 | CYP4Z2P   | 1.8E-04 | 0.4 |
| ILMN_1702973 | TMEM166   | 2.8E-04 | 0.4 |
| ILMN_2116877 | OLFM4     | 2.8E-03 | 0.4 |
| ILMN_1757099 | C10orf81  | 6.9E-03 | 0.4 |
| ILMN_1732398 | SCGB2A1   | 1.2E-04 | 0.4 |
| ILMN_1662795 | CA2       | 3.2E-03 | 0.4 |
| ILMN_1728550 | CYP4Z1    | 4.3E-04 | 0.4 |
| ILMN_1716859 | TDO2      | 2.0E-04 | 0.4 |
| ILMN_1704554 | LOC648470 | 9.5E-05 | 0.4 |
| ILMN_1737650 | DIO2      | 1.1E-05 | 0.3 |
| ILMN_1667893 | TNS3      | 1.1E-05 | 0.3 |
| ILMN_2161820 | GLYATL2   | 6.1E-05 | 0.3 |

Genes differentially expressed 24 h after induction of TAp63 $\alpha$  expression in MDA-MB-468-TAp63 $\alpha$  cells ( $p < 0.05$ )

| PROBE_ID     | GENE SYMBOL | adj-p-values | fold change |
|--------------|-------------|--------------|-------------|
| ILMN_3224962 | TP63        | 5.3E-06      | 10.2        |
| ILMN_2132599 | ANKRD22     | 4.2E-02      | 1.9         |
