# Supplementary material for: ΔNp63α expression induces loss of cell adhesion in triple-negative breast cancer cells
Source: PubMed Central journal article supplement (PMC5057421; doi:10.1186/s12885-016-2808-x), 2016-10-10

**Additional file 4:** Measurement of anoikis resistance of MDA-MB-468- $\Delta$ Np63 $\alpha$  cells

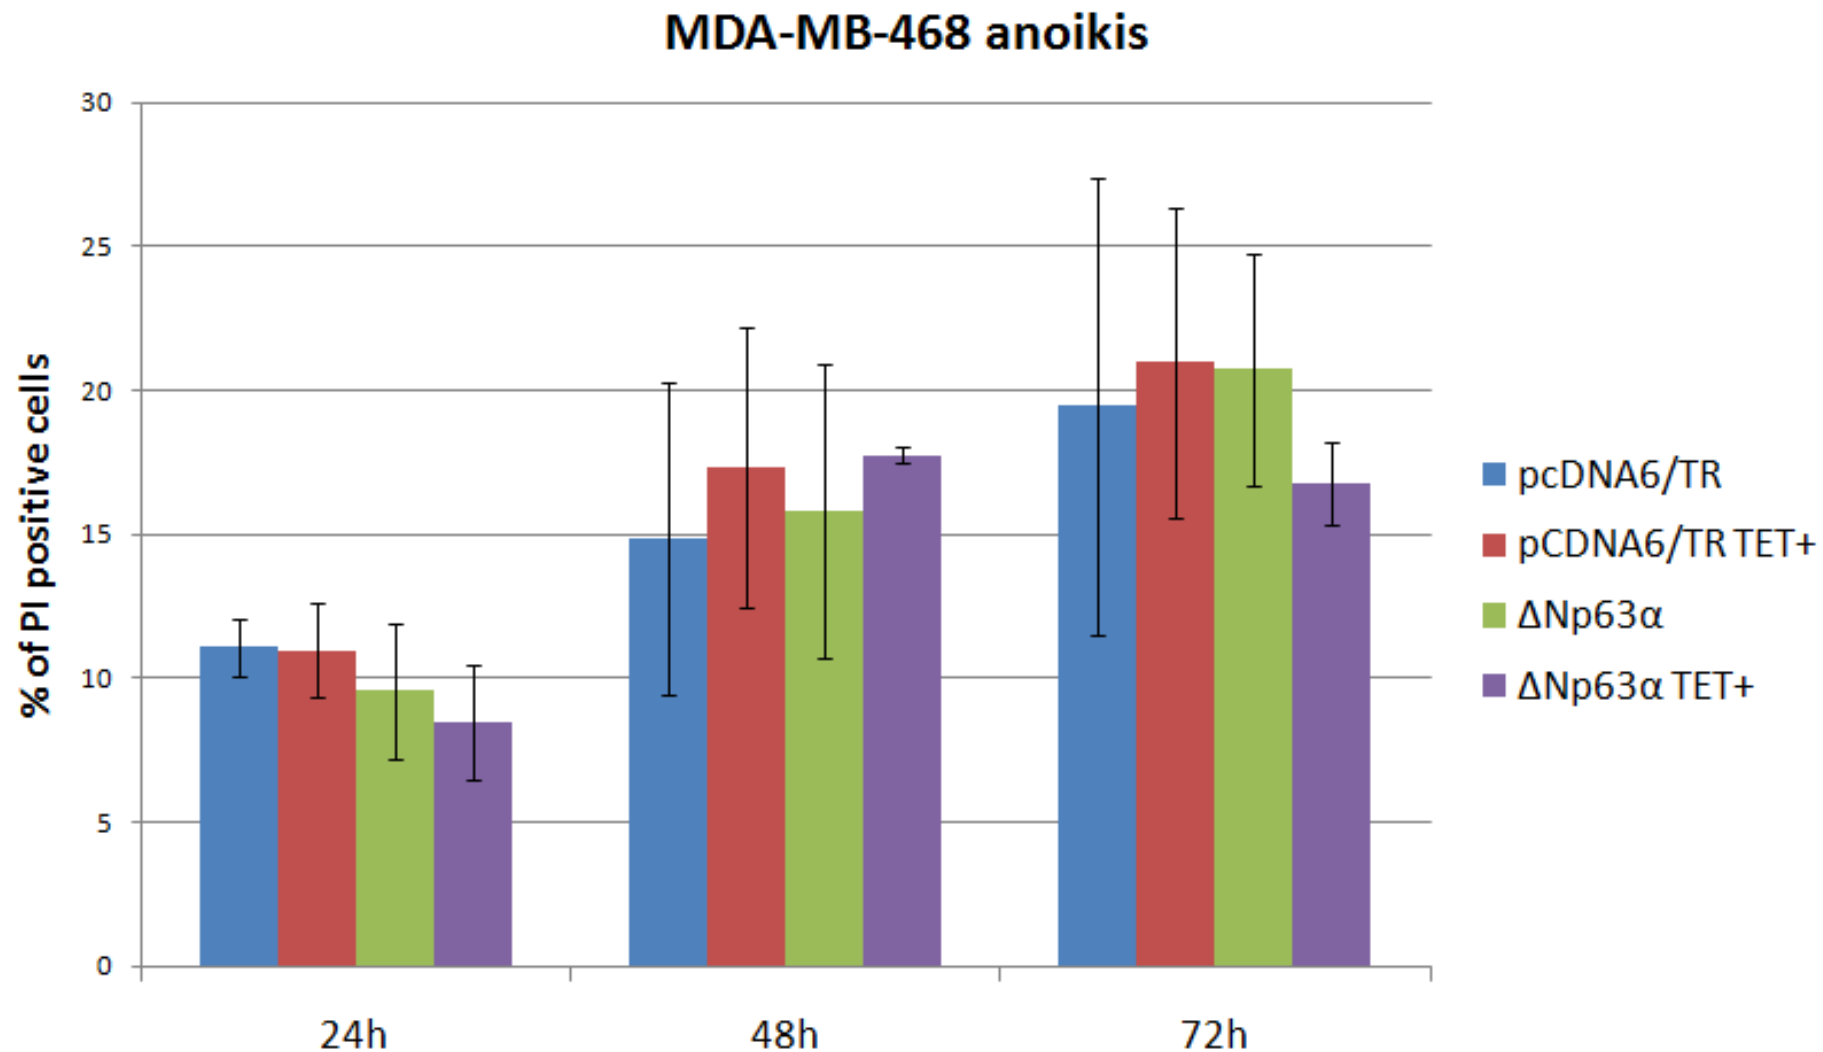

Supplement: 12885_2016_2808_MOESM4_ESM.pdf [file 12885_2016_2808_MOESM4_ESM.pdf]
